# Supplementary material for: Anti-aging Properties of Conditioned Media of Epidermal Progenitor Cells Derived from Mesenchymal Stem Cells
Source: Springer Nature journal article supplement (doi:10.1007/s13555-018-0229-2), 2018-03-02
Supplement: MOESM1 [file 15503888]

Ingredients in Essence (for EPC-CM study)

| No. | INCI NAME                      | FUNCTION     |
|-----|--------------------------------|--------------|
| 1   | Water                          | solvent      |
| 2   | Glycerin                       | humectant    |
| 3   | Glycereth-26                   | humectant    |
| 4   | Diglycerin                     | humectant    |
| 5   | Pentylene Glycol               | humectant    |
| 6   | Alcohol Denat.                 | cosolvent    |
| 7   | Butylene Glycol                | humectant    |
| 8   | 1,2-Hexanediol                 | preservative |
| 9   | Propanediol                    | solvent      |
| 10  | PEG-60 Hydrogenated Castor Oil | surfactant   |
| 11  | Octyldodeceth-16               | surfactant   |
| 12  | Tromethamine                   | pH adjuster  |
| 13  | Polysorbate 20                 | surfactant   |
| 14  | Carbomer                       | thickner     |
| 15  | Xanthan Gum                    | thickner     |
| 16  | Disodium EDTA                  | chelator     |
| 17  | Phenoxyethanol                 | preservative |
| 18  | Fragrance(Parfum)              | fragrance    |
